# Supplementary material for: Maternal Consumption of Ultra-Processed Foods-Rich Diet and Perinatal Outcomes: A Systematic Review and Meta-Analysis
Source: MDPI journal article supplement (doi:10.3390/nu14153242), 2022-08-08
Supplement: s1 [file s1]

**Table S4.** Risk of bias for each individual study assessed by Joanna Briggs Institute critical appraisal checklist for cohort studies.

| Studies                          | Criteria |    |    |    |    |    |    |    |    |     |     |
|----------------------------------|----------|----|----|----|----|----|----|----|----|-----|-----|
|                                  | 1*       | 2* | 3* | 4* | 5* | 6* | 7* | 8* | 9* | 10* | 11* |
| Alves-Santos et al., 2019        | Y        | Y  | Y  | Y  | Y  | Y  | Y  | Y  | Y  | Y   | Y   |
| Ancira-Moreno et al., 2020       | Y        | Y  | Y  | Y  | Y  | Y  | U  | Y  | Y  | U   | Y   |
| Angali, Shahri & Borazjani, 2020 | Y        | Y  | Y  | Y  | Y  | Y  | Y  | Y  | Y  | N   | Y   |
| Barbosa et al., 2021             | Y        | Y  | Y  | Y  | Y  | U  | N  | Y  | Y  | N   | Y   |
| Bärebring et al., 2016           | NA       | Y  | Y  | Y  | Y  | Y  | Y  | N  | Y  | Y   | Y   |
| Baskin et al., 2015              | Y        | Y  | Y  | Y  | Y  | U  | Y  | Y  | Y  | Y   | N   |
| Borgen et al., 2012              | Y        | Y  | Y  | Y  | Y  | Y  | Y  | Y  | Y  | Y   | Y   |
| Brantsæter et al., 2009          | Y        | Y  | Y  | Y  | Y  | Y  | Y  | Y  | Y  | U   | Y   |
| Chen et al., 2009                | Y        | Y  | Y  | Y  | Y  | Y  | N  | Y  | Y  | U   | Y   |
| Coelho et al., 2015              | N        | Y  | N  | Y  | Y  | Y  | N  | U  | U  | U   | Y   |
| Dale et al., 2019                | NA       | Y  | Y  | Y  | Y  | Y  | Y  | Y  | Y  | Y   | Y   |
| Dominguez et al., 2014           | Y        | Y  | Y  | Y  | Y  | Y  | Y  | Y  | Y  | Y   | Y   |
| Donazar-Ezcurra et al., 2017     | Y        | Y  | Y  | Y  | Y  | Y  | Y  | Y  | Y  | Y   | Y   |
| Donazar-Ezcurra et al., 2017     | Y        | Y  | Y  | Y  | Y  | Y  | Y  | Y  | Y  | Y   | Y   |
| Englund-Ögge et al., 2014        | Y        | Y  | Y  | Y  | Y  | Y  | Y  | Y  | U  | U   | Y   |
| Englund-Ögge et al., 2014        | Y        | Y  | Y  | Y  | Y  | Y  | Y  | Y  | Y  | U   | Y   |
| Gomes et al., 2020               | Y        | Y  | Y  | Y  | Y  | Y  | Y  | Y  | Y  | Y   | Y   |
| Grundt et al., 2016              | Y        | Y  | Y  | Y  | Y  | Y  | Y  | Y  | Y  | Y   | Y   |
| Günther et al., 2019             | Y        | Y  | Y  | Y  | Y  | Y  | Y  | Y  | Y  | Y   | Y   |
| Hajianfar et al., 2018           | Y        | Y  | Y  | Y  | Y  | Y  | Y  | Y  | Y  | Y   | Y   |
| Hajianfar et al., 2018           | Y        | Y  | Y  | Y  | Y  | Y  | Y  | Y  | Y  | Y   | Y   |
| Hirko et al., 2020               | Y        | Y  | Y  | Y  | Y  | U  | Y  | Y  | Y  | Y   | Y   |
| Ikem et al., 2019                | Y        | Y  | Y  | Y  | Y  | Y  | Y  | Y  | Y  | Y   | Y   |
| Itani et al., 2020               | Y        | Y  | Y  | Y  | Y  | Y  | Y  | Y  | Y  | Y   | Y   |
| Ker et al., 2021                 | N        | Y  | N  | Y  | Y  | U  | Y  | Y  | Y  | NA  | Y   |
| Lamyian et al., 2017             | Y        | Y  | Y  | Y  | Y  | Y  | Y  | Y  | Y  | Y   | Y   |
| Mari-Sanchiz et al., 2017        | Y        | Y  | Y  | Y  | Y  | Y  | Y  | Y  | Y  | Y   | Y   |
| Martin et al., 2016              | Y        | Y  | Y  | Y  | Y  | Y  | N  | Y  | N  | N   | Y   |
| Martin et al., 2015              | Y        | Y  | N  | Y  | Y  | Y  | Y  | Y  | Y  | Y   | Y   |
| Maugeri et al., 2019             | Y        | Y  | Y  | Y  | Y  | Y  | Y  | Y  | Y  | Y   | Y   |
| Mikeš et al., 2021               | Y        | Y  | Y  | Y  | Y  | Y  | Y  | N  | Y  | U   | Y   |
| Mitku et al., 2020               | Y        | Y  | Y  | Y  | Y  | Y  | Y  | Y  | Y  | Y   | Y   |
| Nascimento et al., 2016          | Y        | Y  | Y  | Y  | Y  | Y  | Y  | N  | Y  | Y   | Y   |
| Nicoli et al., 2021              | U        | Y  | Y  | Y  | Y  | U  | Y  | N  | U  | U   | Y   |
| Okubo et al., 2012               | Y        | Y  | Y  | Y  | Y  | Y  | Y  | Y  | Y  | Y   | Y   |
| Rasmussen et al., 2014           | Y        | Y  | Y  | Y  | Y  | Y  | Y  | Y  | Y  | Y   | Y   |
| Rohatgi et al., 2017             | NA       | NA | Y  | Y  | Y  | Y  | Y  | Y  | Y  | U   | Y   |
| Schmidt et al., 2020             | Y        | Y  | Y  | Y  | Y  | Y  | Y  | Y  | Y  | Y   | Y   |
| Tamada et al., 2021              | Y        | Y  | Y  | Y  | Y  | Y  | N  | Y  | Y  | Y   | Y   |
| Teixeira et al., 2020            | Y        | Y  | Y  | Y  | Y  | Y  | Y  | Y  | Y  | Y   | Y   |
| Tielemans et al., 2015           | Y        | Y  | Y  | Y  | Y  | U  | Y  | Y  | Y  | Y   | Y   |
| Uusitalo et al., 2009            | Y        | Y  | Y  | Y  | Y  | Y  | Y  | N  | Y  | Y   | Y   |
| Wen et al., 2013                 | Y        | Y  | Y  | Y  | Y  | Y  | N  | Y  | Y  | U   | Y   |
| Wrottesley, Pisa & Norris, 2017  | Y        | Y  | Y  | Y  | Y  | Y  | Y  | Y  | Y  | Y   | Y   |
| Yong et al., 2021                | Y        | Y  | Y  | Y  | Y  | Y  | Y  | Y  | Y  | NA  | Y   |
| Zhang et al., 2006               | Y        | Y  | Y  | Y  | Y  | Y  | Y  | U  | Y  | Y   | Y   |
| Zhu et al., 2017                 | Y        | Y  | Y  | Y  | Y  | Y  | Y  | Y  | Y  | Y   | Y   |

Y = Yes, N = No, U = Unclear, NA = Not applicable

- 1\* The two groups were similar and recruited from the same population.
- 2\* The exposures were measured similarly to assign people to both exposed and unexposed groups.
- 3\* The exposure was measured in a valid and reliable way.
- 4\* The confounding factors were identified.
- 5\* Strategies to deal with confounding factors were stated.

- 6\* The groups/participants were free of the outcome at the start of the study (or at the moment of exposure).
- 7\* The outcomes were measured in a valid and reliable way.
- 8\* The follow up time was reported and sufficient to be long enough for outcomes to occur.
- 9\* The follow up was complete, and if not, the reasons to loss to follow up were described and explored.
- 10\* Strategies to address incomplete follow up were utilized.
- 11\* Appropriate statistical analysis.

**Table S5.** Risk of bias for each individual study assessed by Joanna Briggs Institute critical appraisal checklist for cross-sectional studies.

| Studies                          | Criteria |    |    |    |    |    |    |    |
|----------------------------------|----------|----|----|----|----|----|----|----|
|                                  | 1*       | 2* | 3* | 4* | 5* | 6* | 7* | 8* |
| Ferreira et al., 2022            | Y        | Y  | Y  | Y  | Y  | Y  | N  | Y  |
| Garay et al, 2019                | Y        | Y  | Y  | Y  | Y  | Y  | Y  | Y  |
| Grieger, et al., 2014            | Y        | Y  | Y  | Y  | Y  | Y  | Y  | Y  |
| Loy, Marhazlina & Jan, 2013      | Y        | Y  | Y  | Y  | Y  | Y  | Y  | Y  |
| Liu et al., 2021                 | N        | Y  | Y  | Y  | Y  | Y  | N  | Y  |
| Marquez, 2012                    | Y        | Y  | Y  | Y  | Y  | Y  | Y  | Y  |
| Rodrigues, Azeredo & Silva, 2020 | Y        | Y  | Y  | Y  | Y  | Y  | Y  | Y  |
| Zareei et al, 2019               | Y        | Y  | Y  | Y  | Y  | Y  | Y  | Y  |
| Zuccolotto et al, 2019           | Y        | Y  | Y  | Y  | Y  | Y  | Y  | Y  |

Y = Yes, N = No, U = Unclear, NA = Not applicable

- 1\* Criteria for inclusion in the sample clearly defined.
- 2\* Study subjects and the setting described in detail.
- 3\* Exposure measured in a valid and reliable way.
- 4\* Objective, standard criteria used for measurement of the condition.
- 5\* Confounding factors identified.
- 6\* Strategies to deal with confounding factors stated.
- 7\* Outcomes measured in a valid way.
- 8\* Appropriate statistical analysis.

**Table S6.** Risk of bias for each individual study assessed by Joanna Briggs Institute critical appraisal checklist for case-control studies.

| Studies                   | Criteria |    |    |    |    |    |    |    |    |     |
|---------------------------|----------|----|----|----|----|----|----|----|----|-----|
|                           | 1*       | 2* | 3* | 4* | 5* | 6* | 7* | 8* | 9* | 10* |
| Abbasi et al., 2019       | Y        | Y  | Y  | Y  | Y  | Y  | Y  | Y  | Y  | Y   |
| Amezcu-Prieto et al, 2019 | Y        | Y  | Y  | Y  | Y  | Y  | Y  | Y  | U  | Y   |
| Asadi et al., 2019        | Y        | Y  | Y  | Y  | Y  | Y  | Y  | Y  | Y  | Y   |
| Chen et al., 2020         | Y        | Y  | Y  | Y  | Y  | Y  | Y  | Y  | Y  | Y   |
| Sedaghat et al, 2017      | Y        | Y  | Y  | Y  | Y  | Y  | Y  | Y  | Y  | Y   |

Y = Yes, N = No, U = Unclear, NA = Not applicable

- 1\* Groups comparable other than the presence of disease in cases or the absence of disease in controls.
- 2\* Cases and controls matched appropriately.
- 3\* Same criteria used for identification of cases and controls.
- 4\* Exposure measured in a standard, valid and reliable way.
- 5\* Exposure measured in the same way for cases and controls.
- 6\* Confounding factors identified
- 7\* Strategies to deal with confounding factors stated.
- 8\* Outcomes assessed in a standard, valid and reliable way for cases and controls.
- 9\* Exposure period of interest long enough to be meaningful.
- 10\* Appropriate statistical analysis.
