# Supplementary material for: Maternal Consumption of Ultra-Processed Foods-Rich Diet and Perinatal Outcomes: A Systematic Review and Meta-Analysis
Source: MDPI journal article supplement (doi:10.3390/nu14153242), 2022-08-08
Supplement: s1 [file s1]

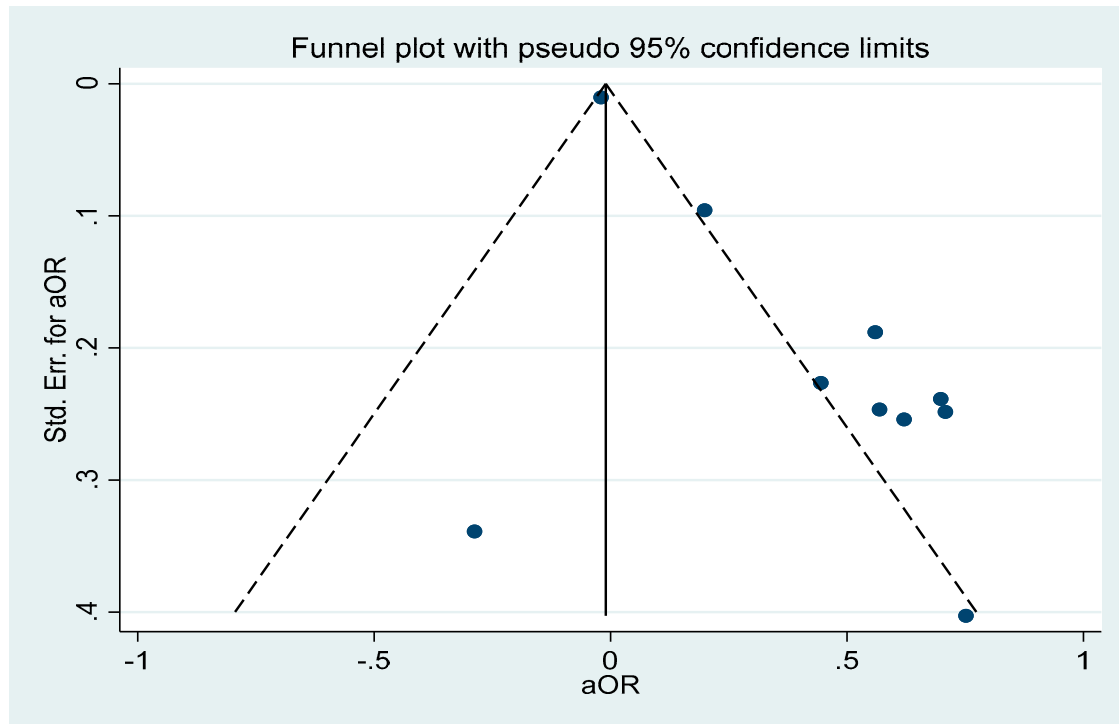

**Supplementary figure S1.** Publication bias funnel graph for UPF consumption and Gestational Diabetes Mellitus risk. Asymmetry was observed and confirmed by Egger test ( $p=0,001$ ).
