# Supplementary material for: Maternal Consumption of Ultra-Processed Foods-Rich Diet and Perinatal Outcomes: A Systematic Review and Meta-Analysis
Source: MDPI journal article supplement (doi:10.3390/nu14153242), 2022-08-08
Supplement: s1 [file s1]

| <b>Parameter</b>    | <b>Criteria</b>                                                                                                                     |
|---------------------|-------------------------------------------------------------------------------------------------------------------------------------|
| <b>Participants</b> | Pregnant women                                                                                                                      |
| <b>Exposure</b>     | Ultra-processed food consumption                                                                                                    |
| <b>Comparisons</b>  | -                                                                                                                                   |
| <b>Outcomes</b>     | Maternal and neonatal outcomes<br>(i.e. gestational hypertension and diabetes,<br>gestational weight gain, birth size, prematurity) |
| <b>Study design</b> | Observational studies                                                                                                               |

Table S1: PECOS acronym used in the design of the study
