# Supplementary material for: Maternal Consumption of Ultra-Processed Foods-Rich Diet and Perinatal Outcomes: A Systematic Review and Meta-Analysis
Source: Nutrients. 2022 Aug 8;14(15):3242. doi: 10.3390/nu14153242 (PMC9370797; doi:10.3390/nu14153242)
Supplement: Supplementary file 1 [file nutrients-14-03242-s001.zip]

Archive with 6 entries (6 files):
- 1. Appendix S1_ PRISMA_2020_checklist item.pdf
- 2. Table S1 PECOS acronym used in the design of the study.pdf
- 3. Table S2_ Database search strategies.pdf
- 4. Table S3_Excluded articles and reasons for exclusion.pdf
- 5. Tables S4_S5_S6.pdf
- 6. Supplementary figure S1.pdf
